# Toxicity drives facilitation between four bacterial species

Philippe Piccardi<sup>1</sup>, Björn Vessman<sup>1</sup>, and Sara Mitri<sup>1,2,✉</sup>

<sup>1</sup>Department of Fundamental Microbiology, University of Lausanne, Switzerland  
<sup>2</sup>Swiss Institute for Bioinformatics

## Abstract

Competition between microbes is extremely common, with many investing in a wide range of mechanisms to harm other strains and species. Yet positive interactions between species have also been documented. What makes species help or harm each other is currently unclear. Here, we studied the interactions between four bacterial species capable of degrading Metal-Working Fluids (MWF), an industrial coolant and lubricant, which contains growth substrates as well as toxic biocides. We were surprised to find only positive or neutral interactions between the four species. Using mathematical modeling and further experiments, we show that positive interactions in this community are likely due to the toxicity of MWF, whereby each species' detoxification benefited the others by facilitating their survival, such that they could grow and degrade MWF better when together. The addition of nutrients, the reduction of toxicity or the addition of more species instead resulted in competitive behavior. Our work provides support to the stress gradient hypothesis by showing how harsh, toxic environments can strongly favor facilitation between microbial species and mask underlying competitive interactions.

Cooperation | Competition | Mutualism | Metal Working Fluid | Stress Gradient Hypothesis | Species diversity | Community function | Bacterial community  
Correspondence: [sara.mitri@unil.ch](mailto:sara.mitri@unil.ch)

## Introduction

A microbial cell living in the human gut, in the soil or in a biofuel cell is typically surrounded by cells of its own as well as other strains and species. The way in which it interacts with other community members is key to its growth and survival, and ultimately, to the stability and functioning of the community as a whole (1, 2). Being able to predict community dynamics and functioning over ecological and evolutionary time-scales is not only fundamentally interesting, but can also help develop therapies for microbiome dysbiosis or augment soil to improve agricultural productivity (2–7).

A central question in studying microbial interactions is whether community members cooperate or compete with one another (8–10). Stable cooperation that evolves in two interacting species because of their benefit to one another (9) is only expected under highly restrictive conditions (11, 12), with few documented examples (13). Facilitation (14) is more prevalent since it encompasses cooperation as well as commensalism, where one species accidentally benefits from another, for example by cross-feeding off its waste products (15–19). It appears, however, that microbial life is mostly

competitive: Microbes have evolved a great number of ways to harm other strains and species (20). For example, 25% of gram-negative bacteria possess genes coding for a Type VI Secretion System (21), while 5–10% of actinomycete genomes code for secondary metabolites (22). Such aggressive behavior likely evolved due to competition for available resources, be they nutrients, oxygen or space. Our base expectation is therefore that microbial species will tend to compete (9, 11).

However, whether species help or harm each other appears to depend on environmental gradients (23–29). The Stress Gradient Hypothesis (SGH, (30)), predicts that positive interactions should be more prevalent in stressful environments, while permissive environments should favor competition. The hypothesis has only rarely been tested in microbial communities (23, 29, 31, 32) and the studies that have tested it involve either species whose interactions have been genetically engineered (29), theoretical work (32), or communities containing many species (23, 31), where it is difficult to quantify individual species abundances and their interactions, and to understand why observations are in line with the SGH.

To fill this gap, here we used a synthetic community composed of four bacterial species that has been applied to the bioremediation of highly alkaline and polluting liquids used in the manufacturing industry called Metal-Working Fluids (MWF) (33–35). MWFs contain chemical compounds that are rich nutrient sources for bacteria, such as mineral oils and fatty acids (36), as well as biocides that inhibit microbial activity (35, 37). The four species – *Agrobacterium tumefaciens*, *Comamonas testosteroni*, *Microbacterium saperdae*, and *Ochrobactrum anthropi* – were previously isolated from waste MWF and selected based on their ability to individually survive or grow in MWF (34). The synthetic community was shown to degrade the polluting compounds in MWF more efficiently and reliably than a random community (34, 38). This community in its defined chemical environment, represents a tractable model system for exploring how abiotic and biotic interactions shape the ecological dynamics of microbial communities. By quantifying MWF degradation efficiency and mapping it to species composition and their interactions, this model system can also help answer another key question in microbial ecology: how do inter-species interactions affect ecosystem functioning?

Below, we show that when growing in MWF, facilitation dominates interactions between these four species, and that this is likely due to the toxicity of MWF. By making the

environment more permissive, we further show that interactions become competitive, in a pattern that is consistent with the SGH. In turn, degradation efficiency only improves with community size when the environment is toxic and interactions are positive. Our experiments shed light on how nutrient and toxicity gradients modulate interactions between species and community functioning.

## Results

**Facilitation dominates the community in MWF.** We first characterized the effect of each species in the MWF community on the others. The four species were incubated alone (mono-culture) or in combination with a second species (pairwise co-culture) in shaken flasks containing MWF medium over 12 days (see Methods). The inoculum volume for each species was held constant across all conditions, i.e. the total was higher in co-cultures. In mono-culture, *C. testosteroni* was able to survive and grow in MWF, while *A. tumefaciens* survived in some replicates, and *M. saperdae* and *O. anthropi* did not (Fig. 1A-D). Qualitatively similar results were obtained in an independent repeat of the experiment (Fig. S1). We quantified species interactions by comparing the area under the growth curve (AUC) of mono- and pairwise co-cultures and define an interaction as negative or positive if the AUC of the co-culture is significantly smaller or greater than the AUC of the mono-culture, or neutral otherwise (see Methods). Defining interactions by the AUC means that they may vary with the length of the experiment and the inoculum volume, but the measure nevertheless combines growth rate, death rate and final yield in one value. Using this measure, positive interactions dominated the MWF ecosystem (Fig. 1E, 3A, S1). *C. testosteroni* promoted the survival and growth of all other species, while also benefiting significantly from the presence of *A. tumefaciens* and *M. saperdae*. *M. saperdae* and *O. anthropi* also slightly reduced each other's death rates (Fig. 1C, D). Finally, *A. tumefaciens* rescued *M. saperdae* from extinction (Fig. 1C), but the AUC was not significantly different from *M. saperdae* in mono-culture. We wondered whether these positive interactions between species were specific to these four species, which may have adapted to each other's presence in the past (38). To test for this we grew new isolates that had never previously interacted with our four species, together with *C. testosteroni* and found similar two-way positive effects in MWF (Fig. S2, S3). This suggests that these positive interactions are likely to be accidental rather than having evolved because of their positive effect (facilitation rather than evolved cooperation). Degradation efficiency in all co-cultures that included *C. testosteroni* showed a higher compared to any of the mono-cultures (Fig. 1F). More generally, degradation efficiency correlated positively with population size (Fig. S4, Spearman's  $\rho = 0.77$ ,  $P < 10^{-15}$ ).

**Facilitation is not due to inoculum doubling.** In our experimental setup, the total initial inoculated population was larger in co-cultures compared to the mono-cultures. If all four species detoxify and degrade the same exact compounds

in MWF, positive interactions could be explained by this larger initial cell density. Alternatively, if species differ in their contribution to detoxification, positive interactions should be maintained even if we keep the initial cell density constant across treatments.

To differentiate between these possible explanations, we repeated the experiment with a constant total inoculum volume across pairwise co-cultures and mono-cultures. All species still grew significantly better in the presence of *C. testosteroni*, and *C. testosteroni* benefited from all others (Fig. S5). However, *M. saperdae* and *O. anthropi* died faster in pairwise co-cultures compared to mono-cultures if their partner was also dying. Worse growth was presumably due to halving the focal species' inoculum, rather than a real negative interaction between these species pairs. Indeed, doubling the number of cells in mono-culture showed a significant improvement for all species (F-test,  $df=3$ , all  $P < 0.015$ ). In other words, even though the starting population size of mono-cultures influences survival, the four species appear to functionally complement each other in facilitating growth and survival in MWF.

Together, these first results appear to contradict the expectation that competition should dominate interactions among microbial species (9, 11). However, according to the SGH (30), we expect abiotic stress to induce facilitation. Indeed, since MWF is designed to be sterile, it contains biocides, making it a tough and stressful environment for bacteria (35, 37). We next asked whether the observed positive interactions were due to the toxicity of MWF.

**A resource-explicit model predicts that positive interactions occur in toxic environments.** To explore the possibility that interactions were due to toxicity, we constructed a mathematical model that describes interspecies interactions through their common exposure to nutrients and toxins in batch culture (Fig. 2B). Our model extends MacArthur's consumer-resource model (39). For simplicity, we initially considered two species that share and compete for a single limiting nutrient, and are killed by the same toxin, but do not interact otherwise (see Methods). Species deplete the nutrients as they grow, and can invest a proportion of their growth into producing enzymes that degrade the toxin. To match the experiments, we solved the system of equations for each species in mono- and co-culture with a second species and defined (uni-directional) interactions as the difference between the area under the two growth curves. We then used the model to ask how interactions vary as a function of initial nutrient and toxin concentrations.

If nutrients are low and toxicity high, species in the model die out regardless of whether they are in mono- or co-culture (grey area on far left of Fig. 2C). As nutrients are increased, the co-cultured species manage to degrade the toxins sufficiently, while bacteria in mono-culture cannot survive (Fig. 2A). In this area of the state-space (green area in Fig. 2C), the presence of the second species has a positive effect on the first (rescuing it from death) despite the underlying competition for nutrients. As nutrients are further increased, however, growth rates increase and toxins can be degraded sooner, such

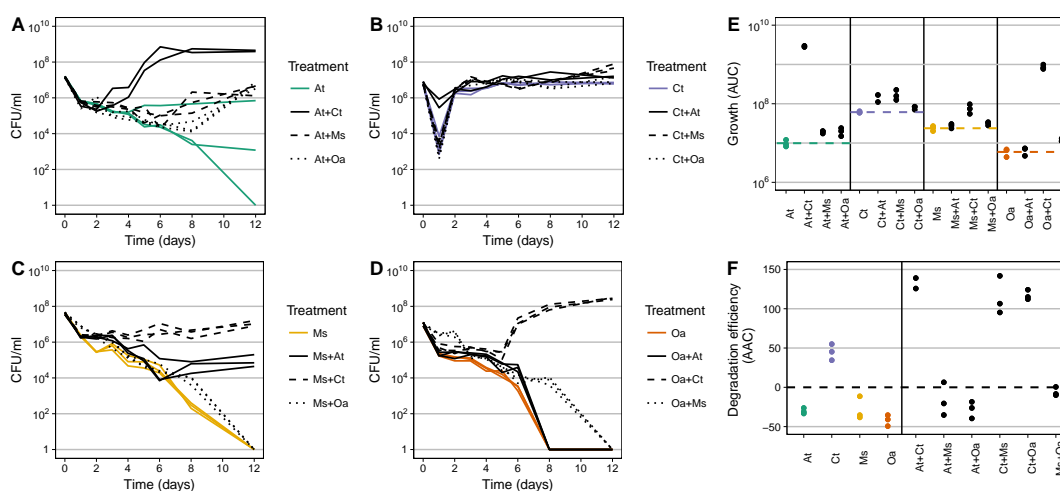

**Fig. 1.** Comparison of mono- and pairwise co-cultures. (A-D) Population size quantified in CFU/ml over time for mono-cultures (in black) and pairwise co-cultures (in color) of *A. tumefaciens* (At), *C. testosteroni* (Ct), *M. saperdae* (Ms) and *O. anthropi* (Oa) in panels (A) to (D), respectively. (E) Area under each of the curves (AUC) in panels (A-D). Dashed lines indicate the mean of the mono-cultures, shown in color. Statistical significance is calculated based on combined data from this and the repetition experiment (Fig. S1), and shown in Fig. 3 and Table S2. (F) Area above the curves (AAC) describing the decrease in Chemical Oxygen Demand (COD, see Methods) over time (i.e. degradation efficiency, Fig. S6A, B). Negative AAC values arise because dead cells increase the COD (Fig. S7). AUC (E) and AAC (F) correlate positively (Fig. S4).

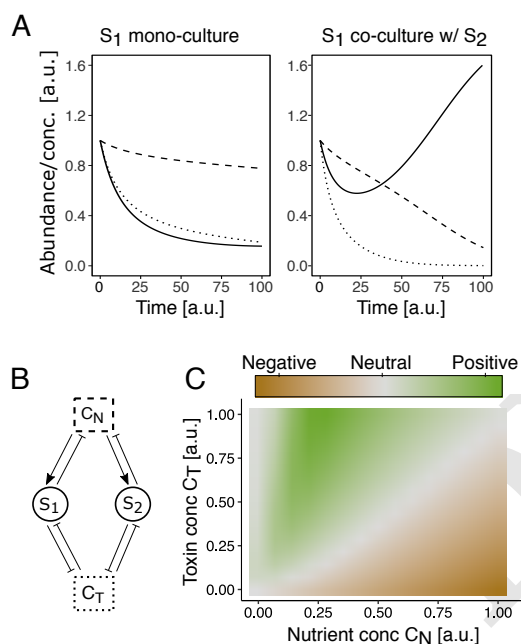

**Fig. 2.** (A) Example results of the model (parameters in Table S3), shown as the abundance of species  $S_1$  (solid) and concentrations of nutrients and toxins (dashed and dotted lines). In mono-culture,  $S_1$  goes extinct due to toxins (left), but survives in co-culture with  $S_2$  (right). (B) Diagram of our resource-explicit mathematical model where species  $S_1$  and  $S_2$  share a substrate containing nutrients and toxins at concentrations  $C_N$  and  $C_T$ . The species take up the same nutrients, invest a fraction of these into toxin degradation and the rest into population growth. Toxins cause cell death and population decline. (C) The response of one species to the presence of another is measured as the difference in AUC between the co- and mono-culture (color, parameters in Table S3) and shown as a function of nutrient and toxin concentrations. At high toxin concentrations and intermediate nutrients, interactions are positive due to the joint degradation of toxins (as in B). As nutrients are increased or toxins decreased, competition for limited resources dominates.

fit from the presence of others. We hypothesized that this regime best describes the four species' growth in MWF. When the two species have the same model parameters, positive interactions rely on the co-culture being inoculated with twice as many cells as the mono-culture, hence twice the degradation effort. According to our experiments, however, positive interactions still dominate even if the total cell number at the beginning is constant, suggesting that facilitation occurs because different species degrade different toxins (Fig. S5). To better represent this effect, we extended our model in Supplementary Note S2 by introducing a second toxin, and letting each species degrade one of the two. In this extended model, as in the experiments, positive interactions arise even when the total cell number is constant.

### The effect of environmental changes on interspecies interactions matches model predictions.

In the model, positive interactions dominate at high toxicity, given that sufficient nutrients are present. Increasing nutrient concentrations further or reducing toxicity instead increase competition. We assumed that our bacteria in the MWF medium lay at the point in the state space where positive interactions are favored, and modified the environment in three additional experiments to test the predictions of the model.

We first increased the concentration of nutrients in the MWF medium by adding 1% amino acids (see Methods), which is a nutrient source for three out of the four species (Fig. S8). In this supplemented MWF medium (MWF+AA), mono-cultures of *A. tumefaciens* and *C. testosteroni* immediately grew well, while *M. saperdae* and *O. anthropi* still suffered from its toxicity (Fig. S9). According to the model, we expect competition between the two species that could grow. Indeed, the two-way positive interaction between *C. testosteroni* and *A. tumefaciens* switched to negative in one direction (Fig. 3B), indicating that a change in nutrient composition can radically modify bacterial interactions. The two species that still experienced the environment as toxic (*M.*

that the presence of a second species becomes unnecessary and even detrimental to the first. The lower the toxin concentration, the faster this competitive effect arises (Fig. 2C). In that case, high toxicity and intermediate nutrients, where species cannot survive alone, is where species in our model bene-



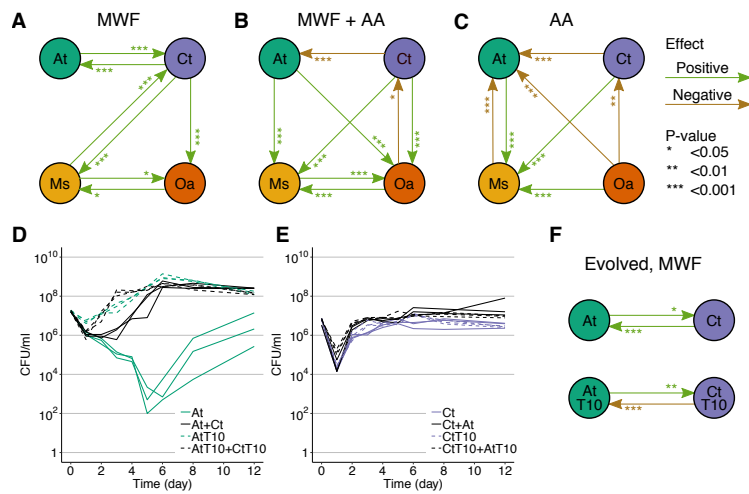

**Fig. 3.** Pairwise interaction networks under different environmental conditions. Positive/negative interactions indicate that the species at the end of an arrow grew significantly better/worse in the presence of the species at the beginning of the arrow in (A) MWF, (B) MWF+AA and (C) AA medium. Statistical significance was calculated based on two experiments in panel (A) (data in Fig. 1 and S1, and one experiment for panels (B) (Fig. S9) and (C) (Fig. S8). All p-values are listed in Table S2. (D) Growth curves of ancestral *A. tumefaciens* (At) and (E) *C. testosteroni* (Ct) versus the same strains after they had evolved in monoculture for 10 weeks (AT10, CtT10). (F) Interactions between ancestral and evolved At and Ct strains based on growth curves in panels (D) and (E). The interactions between At and Ct in panels A and F have different p-values because they come from different experimental repeats.

246 *saperdae* and *O. anthropi*) became the only two species benefiting from being in pairwise co-cultures. 247

248 In the second experiment, we reduced the toxicity of our 249 growth medium by growing the bacteria in 1% amino acids 250 (AA). Ideally, we would have removed some of the toxic 251 compounds in MWF, but MWF is chemically complex and is 252 only sold as a finished product. By removing MWF entirely, 253 the growth medium was no longer toxic, but also lacked some 254 of the nutrients in MWF. Caveats aside, according to the 255 model, we expected this change to increase negative interactions. 256 Indeed, we found all interspecies interactions to be 257 negative, except for *M. saperdae*, whose growth was significantly 258 promoted by all three remaining species. *M. saperdae*'s 259 inability to grow in mono-culture in AA (Fig. S8C) 260 suggests that it relies on cross-feeding from the other three 261 species. While our mathematical model does not explicitly 262 capture cross-feeding interactions and assumes that all 263 species compete for the same nutrient, such positive interactions 264 are common in microbial communities (16).

265 A final way by which we simulated a reduction in environmental 266 toxicity was to allow the bacteria to individually adapt 267 to MWF. We reasoned that if the species evolved to sustain 268 their own growth in MWF, they would lose their positive effects 269 on one another. To test this hypothesis, we conducted 270 experimental evolution on *A. tumefaciens* and *C. testosteroni* 271 by passaging each species alone in MWF for 10 weeks (see 272 Methods, Fig. S10). We did not do this for *M. saperdae* and 273 *O. anthropi* because they could not grow alone in MWF (Fig. 274 1C, D). After 10 weeks, *A. tumefaciens* grew significantly 275 better in MWF, suggesting that it evolved to become more 276 tolerant to its toxicity (Fig. 3D). In the model, this represents 277 a reduction in toxicity. By again comparing mono- and co- 278 cultures, we found that the positive effect of *C. testosteroni* 279 on *A. tumefaciens* in the ancestral strains switched to competitive 280 in the evolved strains, as predicted by the model (Fig. 281 3D-F).

282 Taken together, these results show that positive interactions 283 in our system were most common at high levels of abiotic 284 stress and intermediate nutrient concentrations where most 285 species could not grow, while making the environment more

habitable promoted competition. This observation is in line with the SGH. We next took advantage of our system to ask how interactions change with increasing community size.

### Interactions between more than two species depend on environmental toxicity.

Our model predicts how the sign of interactions changes with respect to increasing species numbers: in a benign environment with low toxicity, a focal species should grow worse with increasing species number (competition, Fig. 4A). When the number of species is increased in a stressful environment, the increased degradation effort first leads to facilitation. But when enough (functionally equivalent) species are present to alleviate the stress, competition should begin to dominate once again, leading to a hump-shaped curve (Fig. 4A, medium toxicity). This competition arises in the model because all species consume the same nutrient, and would be predicted for communities composed of species whose niches overlap. The community size at which species benefit most from the presence of others (the optimal number of species) depends on the environment as shown in Fig. 4B.

To test these predictions, we pooled our data from the mono- and pairwise co-cultures (Fig. 1) with experiments where we grew our species in groups of three and four in all three media and calculated the AUC (Fig. S11–S13). In MWF, all species grew better as community size increased (AUC up to 422-fold higher than mono-culture, Fig. 4C-F, left panels). However, this benefit leveled off eventually, resulting in hump-shaped or saturating curves. In MWF+AA, only *M. saperdae* and *O. anthropi*, the two species that couldn't grow in this medium alone, showed a hump-shaped curve, while *A. tumefaciens* and *C. testosteroni* grew worse with increasing species number. Interestingly, the benefit to *M. saperdae* and *O. anthropi* was considerably higher in MWF+AA than in MWF. This is may be because *A. tumefaciens* and *C. testosteroni* detoxify the environment even further or faster if they can grow well (32, 40, 41). Finally, in AA, increasing competition was observed for all except *M. saperdae*, which was unable to grow alone (Fig. S8C).

In sum, positive interactions occurred in environments that were highly stressful for a species when alone. As this stress

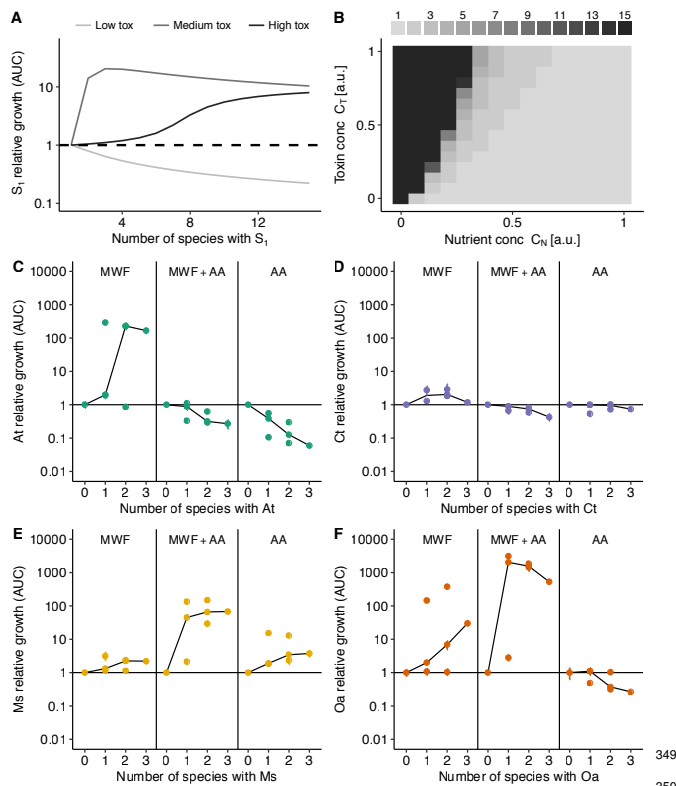

**Fig. 4.** (A) Our model predicts that for a focal strain, an increasing community size eventually becomes detrimental. The number at which such competition starts depends on environmental toxicity. (B) The optimal number of species with respect to the AUC of a focal strain (peak in panel A) varies with nutrient and toxin concentrations. (C–F) Each species' growth expressed in fold-change in its AUC divided by its mean mono-culture AUC in the three different media. Each point shows the mean of a culture treatment composed of 1 to 4 species, and vertical lines show standard deviations. Black lines connect the median points. In environments where a species could not grow alone, the curves are hump-shaped, while in more benign environments, species grow less well in the presence of others.

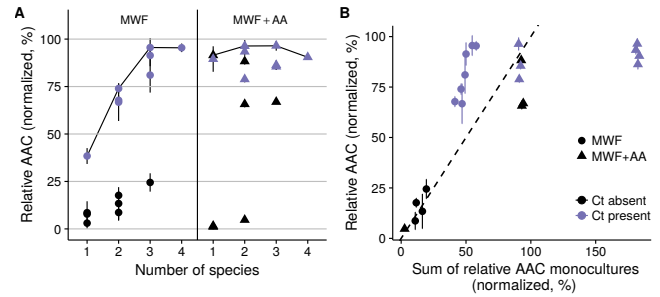

**Fig. 5.** Degradation efficiency as a function of species number. (A) Area Above the Curve (AAC) of COD (see Methods), normalized such that all values are between 0 and 100%. Each point shows the mean of a culture treatment composed of 1 to 4 species, and vertical lines show standard deviations. Blue (or black) data-points show cultures where *C. testosteroni* was present (or absent). Cultures growing on MWF (left) only reach their maximum degradation potential once three species are present (see black line connecting the maximum mean values). In MWF+AA (right), even single species can degrade as efficiently as the best cultures. In a more benign environment, there is less need for a diverse community. (B) Prediction of an additive model of the sum of degradation efficiencies of individual species is plotted against degradation efficiency of the co-cultures in both growth media. Data-points correspond to co-culture means, and vertical lines show standard deviations (same as data for >1 species in panel A). In MWF, co-cultures are more efficient than the sum of the corresponding mono-cultures (most points above dashed line), while in MWF+AA, they are equally or less efficient (most points below the dashed line). The presence of *C. testosteroni* explains much of the AAC in both panels.

the benefit in degradation efficiency of a third species is not only due to a larger population size.

The contrast between the two media becomes even clearer if we apply an additive null model to degradation efficiency (i.e., degradation of each species is independent of the other): does the sum of mono-culture degradation efficiencies predict that of the corresponding co-culture? In line with the observed interactions, co-cultures growing in MWF degraded better than the sum of their mono-cultures, while if amino acids were added, the benefit of additional species became minimal (Fig. 5B). A similar analysis on 72 strains (11) found that only few species pairs showed greater productivity in co-culture relative to the prediction of an additive model. Using the same model here, we show that co-culture productivity (i.e. degradation efficiency) changes from being greater to smaller than the null model prediction by simply changing nutrient concentrations.

## Discussion

Quantifying interactions in natural microbial communities remains challenging. By disentangling interactions in a small community, we hope to develop a fundamental understanding that can later be extended to larger ones. What we found in our model system is that facilitative interactions between species occurred in a toxic environment, where only few community members could survive. By presumably improving the environment for their own survival, these species may have accidentally allowed each other to thrive. Once conditions were sufficiently benign, however, competition dominated. These data are in line with the SGH and provide an intuitive explanation for it. Our model (Fig. 4B) then predicts that more diverse communities should be found in toxic environments (40, 42), where similarly, species invasion might be more likely (14, 30).

was reduced either through the presence of other detoxifying species, or due to increased nutrients or decreased toxicity, competitive interactions between them became salient.

### Degradation efficiency only correlates with species number in toxic environments.

Finally, we asked how community size affects its degradation ability and whether that depends on the interactions between its members. In MWF, where interactions were positive (Fig. 3A, 4C-F), increasing species led to better degradation, but did not improve significantly once three species were present (Fig. 5A, F-test comparing the 3-species community with the highest average AAC to the AAC of the 4-species community,  $P = 0.96$ ). Instead, in MWF+AA, where *A. tumefaciens* and *C. testosteroni* experienced competition when other species were added (Fig. 4C, D), degradation efficiency already reached its maximum with a single species, and did not significantly improve in a larger community ( $P = 0.74$  for F-test comparing AACs of the communities with the highest average AAC for each community size). Regardless of whether we added AA to the medium, however, a similar final amount of undegraded carbon remained in the four-species communities (Fig. S15). Interestingly, the total population size already saturated at two species in MWF (Fig. S16), suggesting that

382 One important caveat is that we do not know the molecu- 439  
383 lar mechanisms behind the interactions in our system or the 440  
384 process of MWF degradation. These may be important for 441  
385 predicting its behavior. For example, whether degradation 442  
386 occurs through the passive uptake of toxins or through ex- 443  
387 tracellular enzyme secretion will alter predictions on evolu- 444  
388 tionary stability. It is also unclear why there was a signifi- 445  
389 cant decrease in *C. testosteroni*'s population before exponen- 446  
390 tial growth (Fig. 1B). Our model assumes that cells start to 447  
391 grow when enough toxins have been degraded, but it may 448  
392 instead have been because of slow changes in gene expres- 449  
393 sion patterns, or phenotypic heterogeneity in the population 450  
394 (43, 44). Finally, we cannot be sure that facilitation occurs 451  
395 through toxin degradation. However, the positive effect of 452  
396 *C. testosteroni* on many other species (Fig. 3A, S2) suggests 453  
397 that facilitation occurs through the removal of a toxic com- 454  
398 pound rather than the secretion of a metabolite that so many 455  
399 different species would benefit from. 456

400 Nevertheless, our data help address our original question: 457  
401 what makes species in microbial communities help or harm 458  
402 each other? In all the environments where our species could 459  
403 grow, they competed with one another, suggesting that com- 460  
404 petition is the underlying dynamic between them. Positive 461  
405 effects were instead only observed when species were unable 462  
406 to survive or grow alone. Whether to describe these interac- 463  
407 tions as cooperative is debatable. A conservative, evolution- 464  
408 ary definition of cooperation requires that the relevant phe- 465  
409 notype is selected for because of its positive effect on other 466  
410 species (8, 9, 11, 13). Since we have no information on the 467  
411 evolutionary history of the observed behavior, we prefer to 468  
412 refer to it as facilitation (14, 45, 46) and assume that the in- 469  
413 teractions are an accidental side-effect of each species detox- 470  
414 ifying the MWF for its own survival. 471

415 The idea that interactions between species can change radi- 472  
416 cally depending on the environment is not new (23–29). Yet 473  
417 current methods to measure and predict interactions in mi- 474  
418 crobial communities lack explicit formulations of context- 475  
419 dependency (15, 47–50). By quantitatively assessing how 476  
420 interactions change with environmental parameters such as 477  
421 substrate concentrations or temperature, we can aim to addi- 478  
422 tionally manipulate community dynamics by carefully engi- 479  
423 neering the environment (51).

424 Another major debate in current ecology is whether higher 480  
425 order interactions (HOIs) play an important role in commu- 481  
426 nity dynamics (52–57). If HOIs are present, overall commu- 482  
427 nity dynamics cannot be predicted based on measurements of 483  
428 interactions between subsets of species within it because the 484  
429 addition of species to these subsets modifies previously mea- 485  
430 sured interactions (58). While we do not explicitly search 486  
431 for HOIs here, we provide a logical argument as to why they 487  
432 may be unavoidable: since each new species added to a com- 488  
433 munity is likely to modify the concentrations of nutrients and 489  
434 toxins, and we know that these concentrations can alter in- 490  
435 teractions between species pairs (Fig. 2C), then new species 491  
436 can surely modify existing interactions as described by phe- 492  
437 nomenological models (27, 57). This does not necessarily 493  
438 mean that community dynamics are unpredictable, however, 494

but simply that all components of a system – including sub-  
strate concentrations and uptake rates – need to be considered  
to make accurate predictions. This is difficult in practice,  
but our argument highlights the need for more mechanistic,  
resource-explicit models in ecology (28, 59–62).

There is an increasing interest in engineering synthetic mi-  
crobial communities for practical applications (4, 6, 7, 33,  
59, 63, 64). It has been commonly observed that community  
function saturates with increasing species diversity (64–66).  
Here we have shown that the rate at which our function of in-  
terest (MWF degradation efficiency) saturated depended on  
environmental toxicity (Fig. 5). This suggests that a harsh  
environment might require a larger community whose mem-  
bers can facilitate each other's growth to achieve the desired  
task. In contrast, making the environment too permissive can  
reduce the potential benefits of increasing community size  
due to competition or even competitive exclusion arising be-  
tween its members. Designing stable consortia in environ-  
ments where many species are able to grow may therefore  
be difficult. In other applications, such as antibiotic treat-  
ment, where the goal is to eliminate a pathogenic species, it  
may be that antibiotic toxicity inadvertently leads to facili-  
tation between the surviving organisms. Indeed, we know  
that antibiotic-resistant bacteria can protect neighboring cells  
from antibiotics (67–70).

One of the major challenges in current microbial ecology lies  
in quantifying interactions between species, determining how  
they are mediated and how they affect community function  
(2). Using an accessible model system where individual pop-  
ulations and overall community function can be quantified  
over time has allowed us to address some of these questions.  
Ecosystems such as this one that use natural bacterial isolates  
(15, 48, 70–73) are powerful tools that will help disentangle  
the complexity of natural microbial communities.

## Materials and Methods

**Bacterial species and growth media.** This study included  
four bacterial species: *Agrobacterium tumefaciens*, *Coma-  
monas testosteroni*, *Microbacterium saperdae* and *Ochrobac-  
trum anthropi*. *A. tumefaciens* was modified with a Tn7  
transposon containing a GFP marker, and *O. anthropi* with  
a Tn5 transposon containing an mCherry marker to allow  
us to distinguish colonies of all four species (see below).  
The four bacterial species were isolated from waste MWF  
in a previous study, based on their ability to degrade differ-  
ent MWF substrates (34, 74). It should be noted the waste  
MWF is less toxic than the fresh MWF that we are prepar-  
ing here. The identities of the four species were confirmed  
through 16S gene sequencing. Six additional species iso-  
lated from MWF and kindly donated by Peter Kuenzi from  
Blaser Swisslube AG, were also used for supplementary ex-  
periments: *Aeromonas caviae*, *Delftia acidovorans*, *Empe-  
dobacter falsenii*, *Klebsiella pneumoniae*, *Shewanella putre-  
faciens*, *Vagococcus fluviialis*. The species were identified  
at Blaser Swisslube AG by MALDI-TOF, and confirmed by  
PCR amplification and 16S gene sequencing.

The Metal-Working Fluid (MWF) used in this study (Castrol



495 Hysol™ XF, acquired in 2016) was chosen because of the 549  
496 ability of the four-species co-culture to grow in it and degrade 550  
497 it. The MWF medium was prepared at a concentration of 551  
498 0.5% (v/v), diluted in water with the addition of selected salts 552  
499 and metal traces to support bacterial growth (Table S1). In 553  
500 addition to (i) the MWF medium, we also conducted growth 554  
501 experiments in (ii) the MWF medium supplemented with 555  
502 1% Casamino Acids (Difco, UK) (MWF+AA) and (iii) the 556  
503 same selected salts and metal traces supplemented with 1% 557  
504 Casamino Acids only (AA). This third medium was identi- 558  
505 cal to the second, except for the lack of MWF. All medium 559  
506 compositions are listed in Table S1. 560

507 **Experimental setup.** Before each experiment, each of the  
508 four species was independently grown in tryptic soy broth 563  
509 (TSB) overnight starting from a single colony (28°C, 200 564  
510 rpm) in Erlenmeyer flasks (50 ml) containing 10ml of TSB. 565  
511 The next day, the optical density (OD<sub>600</sub>) of the overnight 566  
512 cultures was measured using a spectrophotometer (Ultrospec 567  
513 10, Amersham Biosciences), and each species was then in- 568  
514 oculated at a standardized OD<sub>600</sub> of 0.05 into an Erlenmeyer 569  
515 flask (100 ml) containing 20ml of TSB and grown for 3 hours 570  
516 (28°C, 200 rpm) to obtain bacteria in exponential phase with 571  
517 a final concentration of approximately 10<sup>6</sup>-10<sup>7</sup> CFU/ml at 572  
518 the beginning of each experiment. These starting population 573  
519 sizes were quantified through plating on agar (see below). 574

520 For monocultures, 200µl of this final TSB culture were har- 575  
521 vested for each species and spun down at 10,000 rcf for 5 576  
522 minutes. For co-cultures, 200µl of the TSB cultures of each 577  
523 species were first mixed together (e.g. for 2 species, the total 578  
524 was 400µl), then spun down. Experiments were also con- 579  
525 ducted where the total was fixed to 200µl (Fig. S5). The su- 580  
526 pernatant was discarded and the pellet resuspended in 30ml 581  
527 of growth medium (e.g. MWF medium) in 100ml glass tubes. 582  
528 In most experiments, 15 treatments (mono-cultures, all pair- 583  
529 wise, triplet and quadruplet co-cultures) were conducted si- 584  
530 multaneously in triplicate to give 45 experimental cultures in 585  
531 addition to a sterile control. All tubes were incubated at 28°C 586  
532 and shaken at 200 rpm for a total of 12 days. 587

533 **Quantifying population size.** To quantify the population 589  
534 size of each species over time, 200µl were collected on days 590  
535 1-6, 8, and 12, from each culture tube, serially diluted and 591  
536 plated onto lysogeny broth (LB) agar or trypticase soy agar 592  
537 (TSA) (Difco, UK) plates and incubated at 28°C to count 593  
538 colony-forming units (CFUs). *C. testosteroni* colonies were 594  
539 visible after 24 hours on TSA, while *A. tumefaciens*, *M.* 595  
540 *saperdae* and *O. anthropi* were visible after 48 hours on LB 596  
541 agar. To distinguish the latter three species when growing 597  
542 in co-culture, in addition to LB agar, cells were also plated 598  
543 onto LB agar plates containing either: (i) 14.25µg/ml of sul- 599  
544 famethoxazole and 0.75µg/ml of trimethoprim to count only 600  
545 *A. tumefaciens* CFUs; (ii) 2µg/ml of imipenem to count only 601  
546 *M. saperdae* CFUs; or (iii) 10µg/ml of colistin to count only 602  
547 *O. anthropi* CFUs. The fluorescent markers further helped to 603  
548 verify our counts on LB agar. 604

**Quantifying interspecies interactions.** To infer interac-  
tions between species, we calculated the area under the  
growth curve (AUC) of each species in mono-culture and  
in its pairwise co-culture with each of the other 3 species.  
We repeated the experiment in the MWF medium on two in-  
dependent occasions, each in triplicate. We used a blocked  
ANOVA with “experiment” as a random effect to test for sig-  
nificant differences. If the AUC was significantly greater or  
smaller in a pairwise co-culture (P<0.05), we deemed the in-  
teraction to be positive or negative, respectively. Calculated  
P-values are shown in Table S2. For the other two media  
(MWF+AA and AA) and the evolved strains, the pairwise  
co-culture experiments were performed once only, so F-tests  
were used to calculate which interactions were significant.

**Quantifying degradation efficiency (Chemical Oxygen Demand).** Chemical oxygen demand (COD) was used as a proxy for the total carbon in the MWF. A significant reduction in COD relative to the sterile control was considered as degradation and the Area Above the Curve (AAC, the integral between the control and the biotic curve) represents degradation efficiency. Briefly, 1ml of MWF emulsion was harvested at the beginning of the experiment, and on days 1-6, 8, and 12, centrifuged (16,000 rcf for 15 minutes) to remove suspended cells (we found that cellular material increases the COD, Fig. S7). Centrifugation separated the MWF into two liquid phases. The top phase was carefully pipetted and discarded, while 200 µl of the second phase was added to NANOCOLOR COD tube tests, detection range 1-15 g/l by Macherey-Nagel (ref: 985 038), heated at 160°C for 30 mins, cooled to room temperature, and the color change quantified on a LASA 7 100 colorimeter (Hach Lange, UK).

**Adapting bacteria to MWF medium.** *A. tumefaciens* and *C. testosteroni* were grown in MWF medium as described above for 7 days (28°C, 200 rpm) in five replicate mono-cultures. After 7 days, 30 ml of fresh MWF medium was prepared and 300 µl of the week-old culture transferred into it. This was repeated every week for a total of 10 weeks. At the beginning and at the end of every week, population sizes were quantified using CFUs as described above. After 3 weeks, three replicate populations of *A. tumefaciens* had gone extinct (Fig. S10). After 10 weeks, one colony was isolated from the first replicate of the evolved populations of *A. tumefaciens* and *C. testosteroni*, and the interactions between them quantified.

**Resource-explicit mathematical model.** We consider our community to consist of  $n$  distinct species, where the change in abundance  $S_i$  of species  $i$  is determined by a growth function  $\rho_i$  and mortality  $\mu_i$  which depend on the concentrations  $C_N$  and  $C_T$  of the nutrient and toxin as shown in Fig. 2B. Nutrient concentrations decrease as a function of the species' growth via the biomass yield  $Y_i$ , while toxin concentrations decrease according to the species' production rate  $\delta_i$  of enzymes that degrade the toxin as well as a passive uptake rate  $\kappa_i$ . A fraction  $f_i$  of the collected nutrients are invested into active degradation and the rest into growth. This results in

the following set of differential equations:

$$\frac{dS_i}{dt} = ((1 - f_i)\rho_i(C_N) - \mu_i(C_T))S_i \quad (1a)$$

$$\frac{dC_N}{dt} = - \sum_{i=1}^n \frac{1}{Y_i} \rho_i(C_N)S_i \quad (1b)$$

$$\frac{dC_T}{dt} = -C_T \sum_{i=1}^n (f_i\delta_i\rho_i(C_N) + \kappa_i)S_i \quad (1c)$$

We assume that the growth and death rates saturate with increasing nutrient or toxin concentrations as:

$$\rho_i(C_N) = r_{\max,i} \frac{C_N}{C_N + K_N} \quad (2a)$$

$$\mu_i(C_T) = m_{\max,i} \frac{C_T}{C_T + K_T} \quad (2b)$$

for the nutrient and toxin with half-saturation concentrations  $K_N$ ,  $K_T$  and maximum growth or death rate  $r_{\max}$ ,  $m_{\max}$ . We implemented the model in Python v3.6 using the SciPy library v1.0 and solved with standard ODE solvers for a set of parameters and initial conditions as listed in Table S3. Fig. S17 shows how changes in these parameters and initial conditions affect the outcome of the model. To generate the heat plot in Fig. 2C, we calculated the difference in the AUC of the simulated time-series, between a simulation with initial abundance  $S_1 = S_2 = 1$  and another with initial abundance  $S_1 = 1$  and  $S_2 = 0$ .

#### ACKNOWLEDGEMENTS

We thank Jake Alexander, Kevin Foster, Laurent Keller and all members of the Mitri lab for useful discussions and feedback on the manuscript. We thank Christopher van der Gast and Ian Thompson for providing the four strains used in the study, and for their advice in establishing the protocols. We thank Peter Kuenzi and for providing the additional six MWF isolates, and to Sabrina Rivera for conducting growth experiments with them. We thank Guillermo Osuna for help developing the COD measurement protocol, Marc Garcia-Garcerà and Bastien Vallat for performing colony PCRs and 16S sequencing of the six additional strains, and Avery Becker for producing the dead cells. PP conducted experiments, BV developed the mathematical model, and SM conceived of and supervised the project. All authors participated in the writing of the manuscript. PP is funded by the University of Lausanne. BV and SM are funded by European Research Council Starting Grant 715097.

#### Bibliography

- Michael E Hibbing, Clay Fuqua, Matthew R Parsek, and S Brook Peterson. Bacterial competition: Surviving and thriving in the microbial jungle. *Nature Reviews Microbiology*, 8(1): 15–25, 2010. ISSN 1740-1534. doi: 10.1038/nrmicro2259.
- Stefanie Widder et al. Challenges in microbial ecology: building predictive understanding of community function and dynamics. *The ISME Journal*, 10(11):2557–2568, nov 2016. doi: 10.1038/ismej.2016.45.
- Britt Koskella, Lindsay J. Hall, and C. Jessica E. Metcalf. The microbiome beyond the horizon of ecological and evolutionary theory. *Nature Ecology & Evolution*, 1(11):1606–1615, nov 2017. doi: 10.1038/s41559-017-0340-2.
- Karen De Roy, Massimo Marzorati, Pieter Van den Abbeele, Tom Van de Wiele, and Nico Boon. Synthetic microbial ecosystems: an exciting tool to understand and apply microbial communities. *Environmental Microbiology*, 16(6):1472–1481, jun 2014. ISSN 14622912. doi: 10.1111/1462-2920.12343.
- Jan Dolinšek, Felix Goldschmidt, and David R. Johnson. Synthetic microbial ecology and the dynamic interplay between microbial genotypes. *FEMS Microbiology Reviews*, 40(6): 961–979, nov 2016. ISSN 1574-6976. doi: 10.1093/femsre/fuw024.
- Siavash Atashgahi, Irene Sánchez-Andrea, Hermann J Heipieper, Jan R van der Meer, Alfons J M Stams, and Hauke Smidt. Prospects for harnessing biocide resistance for bioremediation and detoxification. *Science*, 360(6390):743–746, may 2018. doi: 10.1126/science.aar3778.
- Katie Brenner, Lingchong You, and Frances H Arnold. Engineering microbial consortia: a new frontier in synthetic biology. *Trends in biotechnology*, 26(9):483–9, sep 2008. ISSN 0167-7799. doi: 10.1016/j.tibtech.2008.05.004.
- S A West, A S Griffin, A S Gardner, and S P Diggle. Social evolution theory for microorganisms. *Nature Reviews Microbiology*, 4:597–607, 2006. doi: 10.1038/nrmicro1461.
- Sara Mitri and Kevin Richard Foster. The Genotypic View of Social Interactions in Microbial Communities. *Annual Review of Genetics*, 47:247–73, aug 2013. ISSN 1545-2948. doi: 10.1146/annurev-genet-111212-133307.
- Jonathan Friedmann and Jeff Gore. Ecological systems biology: The dynamics of interacting populations. *Current Opinion in Systems Biology*, 1:114–121, feb 2017. doi: 10.1016/j.coi.2016.12.001.
- Kevin R Foster and Thomas Bell. Competition, Not Cooperation, Dominates Interactions among Culturable Microbial Species. *Current biology*, 22(19):1845–50, oct 2012. ISSN 1879-0445. doi: 10.1016/j.cub.2012.08.005.
- Nuno M. Oliveira, Rene Niehus, and Kevin R. Foster. Evolutionary limits to cooperation in microbial communities. *Proceedings of the National Academy of Sciences*, 111(50): 201412673, 2014. ISSN 0027-8424. doi: 10.1073/pnas.1412673111.
- Seth Rakoff-Nahoum, Kevin R. Foster, and Laurie E. Comstock. The evolution of cooperation within the gut microbiota. *Nature*, 533(7602):255–259, apr 2016. ISSN 0028-0836. doi: 10.1038/nature17626.
- John F. Bruno, John J. Stachowicz, and Mark D. Bertness. Inclusion of facilitation into ecological theory. *Trends in Ecology & Evolution*, 18(3):119–125, mar 2003. doi: 10.1016/S0169-5347(02)00045-9.
- Olga Ponomarova and Kiran Raosaheb Patil. Metabolic interactions in microbial communities: untangling the Gordian knot. *Current Opinion in Microbiology*, 27:37–44, oct 2015. doi: 10.1016/j.mib.2015.06.014.
- Joshua E Goldford et al. Emergent simplicity in microbial community assembly. *Science*, 361(6401):469–474, aug 2018. doi: 10.1126/science.aat1168.
- Aleksej Zelezniak, Sergej Andrejev, Olga Ponomarova, Daniel R. Mende, Peer Bork, and Kiran Raosaheb Patil. Metabolic dependencies drive species co-occurrence in diverse microbial communities. *Proceedings of the National Academy of Sciences*, 112(20):201421834, 2015. ISSN 0027-8424. doi: 10.1073/pnas.1421834112.
- Sebastian Germerodt et al. Pervasive Selection for Cooperative Cross-Feeding in Bacterial Communities. *PLOS Computational Biology*, 12(6):e1004986, jun 2016. ISSN 1553-7358. doi: 10.1371/journal.pcbi.1004986.
- Glen D'Souza, Shraddha Shitut, Daniel Preussger, Ghada Yousef, Silvio Waschina, and Christian Kost. Ecology and evolution of metabolic cross-feeding interactions in bacteria. *Natural Product Reports*, 35(5):455–488, 2018. ISSN 14604752. doi: 10.1039/c8np00009c.
- Melanie Ghoul and Sara Mitri. The Ecology and Evolution of Microbial Competition. *Trends in Microbiology*, 24(10):833–845, 2016. ISSN 18784380. doi: 10.1016/j.tim.2016.06.011.
- Frédéric Boyer, Gwennaële Fichant, Jérémie Berthod, Yves Vandenbrouck, and Ina Attree. Dissecting the bacterial type VI secretion system by a genome wide in silico analysis: what can be learned from available microbial genomic resources? *BMC genomics*, 10(1):104, jan 2009. ISSN 1471-2164. doi: 10.1186/1471-2164-10-104.
- Markus Nett, Haruo Ikeda, and Bradley S. Moore. Genomic basis for natural product biosynthetic diversity in the actinomycetes. *Natural Product Reports*, 26(11):1362, 2009. ISSN 0265-0568. doi: 10.1039/b817069j.
- Ingo Fetzer, Karin Johst, Robert Schäwe, Thomas Banitz, Hauke Harms, and Antonis Chatzinotas. The extent of functional redundancy changes as species' roles shift in different environments. *Proceedings of the National Academy of Sciences of the United States of America*, 112(48):14888–93, dec 2015. doi: 10.1073/pnas.1505587112.
- Sonja Blasche et al. Emergence of stable coexistence in a complex microbial community through metabolic cooperation and spatio-temporal niche partitioning. *bioRxiv*, page 541870, feb 2019. doi: 10.1101/541870.
- Angela Liu, Anne M. Archer, Matthew B. Biggs, and Jason A. Papin. Growth-altering microbial interactions are responsive to chemical context. *PLOS ONE*, 12(3):e0164919, mar 2017. doi: 10.1371/journal.pone.0164919.
- Scott A. Chamberlain, Judith L. Bronstein, and Jennifer A. Rudgers. How context dependent are species interactions? *Ecology Letters*, 17(7):881–890, jul 2014. doi: 10.1111/ele.12279.
- Eric J. de Muinck et al. Context-Dependent Competition in a Model Gut Bacterial Community. *PLOS ONE*, 8(6):e67210, jun 2013. doi: 10.1371/journal.pone.0067210.
- David W. Armitage and Stuart E. Jones. How sample heterogeneity can obscure the signal of microbial interactions. *bioRxiv*, page 520668, jan 2019. doi: 10.1101/520668.
- Tim A. Hoek, Kevin Axelrod, Tommaso Biancalani, Eugene A. Yurtsev, Jinghui Liu, and Jeff Gore. Resource Availability Modulates the Cooperative and Competitive Nature of a Microbial Cross-Feeding Mutualism. *PLOS Biology*, 14(8):e1002540, aug 2016. ISSN 1545-7885. doi: 10.1371/journal.pbio.1002540.
- Mark D. Bertness and Ragan Callaway. Positive interactions in communities. *Trends in Ecology & Evolution*, 9(5):191–193, may 1994. doi: 10.1016/0169-5347(94)90088-4.
- Hua Li, Giovanni Colica, Pei-pei Wu, Dunhai Li, Federico Rossi, Roberto De Philippis, and Yongding Liu. Shifting species interaction in soil microbial community and its influence on ecosystem functions modulating. *Microbial ecology*, 65(3):700–8, 2013. ISSN 1432-184X. doi: 10.1007/s00248-012-0171-2.
- Diane Lawrence and Timothy G. Barraclough. Evolution of resource use along a gradient of stress leads to increased facilitation. *Oikos*, pages n/a–n/a, dec 2015. ISSN 00301299. doi: 10.1111/oik.02989.
- C J van der Gast, C J Knowles, M Starkey, and I P Thompson. Selection of microbial consortia for treating metal-working fluids. *Journal of industrial microbiology & biotechnology*, 29(1):20–7, jul 2002. ISSN 1367-5435. doi: 10.1038/sj.jim.7000271.
- Christopher J van der Gast and Ian P Thompson. Patent US 8,703,475 B2, 2014.
- Jerry P. Byers, editor. *Metalworking Fluids*. CRC Press, 3 edition, 2017. ISBN 1351230735.
- Andreas Rabenstein, Thomas Koch, Markko Remesch, Ekkard Brinksmeier, and Jan Kuever. Microbial degradation of water miscible metal working fluids. *International Biodeterioration & Biodegradation*, 63(8):1023–1029, dec 2009. doi: 10.1016/j.ibiod.2009.07.005.
- E. Brinksmeier, D. Meyer, A.G. Huesmann-Cordes, and C. Herrmann. Metalworking fluids—Mechanisms and performance. *CIRP Annals - Manufacturing Technology*, 64(2):605–628, 2015. ISSN 00078506. doi: 10.1016/j.cirp.2015.05.003.
- Christopher J. van der Gast, Andrew S. Whiteley, and Ian P. Thompson. Temporal dynamics and degradation activity of an bacterial inoculum for treating waste metal-working fluid. *Environmental Microbiology*, 6(3):254–263, mar 2004. ISSN 1462-2912. doi: 10.1111/j.1462-2920.2004.00566.x.



- 729 39. R MacArthur and Richard Levins. The limiting similarity, convergence, and divergence of 815  
730 coexisting species. *American Naturalist*, 101(921):377–385, 1967. 816
- 731 40. J. P. Grime. Competitive Exclusion in Herbaceous Vegetation. *Nature*, 242(5396):344–347, 817  
732 mar 1973. ISSN 0028-0836. doi: 10.1038/242344a0. 818
- 733 41. Fernando T Maestre and Jordi Cortina. Do positive interactions increase with abiotic stress? 819  
734 A test from a semi-arid steppe. *Proceedings Biological sciences*, 271 Suppl(Suppl 5):S331– 820  
735 3, aug 2004. doi: 10.1098/rsbl.2004.0181. 821
- 736 42. Richard Michalet et al. Do biotic interactions shape both sides of the humped-back model 822  
737 of species richness in plant communities? *Ecology Letters*, 9(7):767–773, jul 2006. doi: 823  
738 10.1111/j.1461-0248.2006.00935.x. 824
- 739 43. Clément Vulin, Nadja Leimer, Markus Huemer, Martin Ackermann, and Annelies S. Zinker- 825  
740 nagel. Prolonged bacterial lag time results in small colony variants that represent a sub- 826  
741 population of persisters. *Nature Communications*, 9(1):4074, dec 2018. doi: 10.1038/ 827  
742 s41467-018-06527-0. 828
- 743 44. O. Kotte, B. Volkmer, J. L. Radzikowski, and M. Heinemann. Phenotypic bistability in *Es-* 829  
744 *cherichia coli*'s central carbon metabolism. *Molecular Systems Biology*, 10(7):736–736, jul 830  
745 2014. doi: 10.15252/msb.20135022. 831
- 746 45. Sylvie Estrela et al. Environmentally Mediated Social Dilemmas. *Trends in Ecology &*  
747 *Evolution*, 0(0):1–13, 2018. ISSN 01695347. doi: 10.1016/j.tree.2018.10.004.
- 748 46. Judith L. Bronstein. The evolution of facilitation and mutualism. *Journal of Ecology*, 97(6):  
749 1160–1170, nov 2009. ISSN 00220477. doi: 10.1111/j.1365-2745.2009.01566.x.
- 750 47. Charlie G. Buffie et al. Precision microbiome reconstitution restores bile acid mediated  
751 resistance to *Clostridium difficile*. *Nature*, 517(7533):205–208, oct 2014. ISSN 0028-0836.  
752 doi: 10.1038/nature13828.
- 753 48. Eric J. N. Hellfrich et al. Bipartite interactions, antibiotic production and biosynthetic potential  
754 of the *Arabidopsis* leaf microbiome. *Nature Microbiology*, 3(8):909–919, aug 2018. doi:  
755 10.1038/s41564-018-0200-0.
- 756 49. Otso Ovaskainen et al. How are species interactions structured in species-rich communi-  
757 ties? A new method for analysing time-series data. *Proceedings Biological sciences*, 284  
758 (1855):20170768, may 2017. doi: 10.1098/rspb.2017.0768.
- 759 50. Benjamin J. Ridenhour et al. Modeling time-series data from microbial communities. *The*  
760 *ISME Journal*, 11(11):2526–2537, nov 2017. ISSN 1751-7362. doi: 10.1038/ismej.2017.107.
- 761 51. Sarah P Hammarlund, Jeremy M Chacón, and William R Harcombe. A shared limit-  
762 ing resource leads to competitive exclusion in a cross-feeding system. *bioRxiv*, page  
763 10.1101/354282, 2018. ISSN 14622912. doi: 10.1101/354282.
- 764 52. Alicia Sanchez-Gorostiaga, Djordje Bajić, Melisa L. Osborne, Juan F Poyatos, and Alvaro  
765 Sanchez. High-order interactions dominate the functional landscape of microbial consortia.  
766 *bioRxiv*, page 333534, may 2018. doi: 10.1101/333534.
- 767 53. Manon Morin, Emily C Pierce, and Rachel J Dutton. Changes in the genetic requirements  
768 for microbial interactions with increasing community complexity. *eLife*, 7, sep 2018. doi:  
769 10.7554/eLife.37072.
- 770 54. Jonathan M. Levine, Jordi Bascompte, Peter B. Adler, and Stefano Allesina. Beyond pair-  
771 wise mechanisms of species coexistence in complex communities. *Nature*, 546(7656):56–  
772 64, may 2017. doi: 10.1038/nature22898.
- 773 55. Jonathan Friedman, Logan M Higgins, and Jeff Gore. Community structure follows simple  
774 assembly rules in microbial microcosms. *Nature Ecology & Evolution*, 1(5):0109, mar 2017.  
775 ISSN 2397-334X. doi: 10.1038/s41559-017-0109.
- 776 56. Eyal Bairey, Eric D. Kelsic, and Roy Kishony. High-order species interactions shape ecosys-  
777 tem diversity. *Nature Communications*, 7(1):12285, dec 2016. doi: 10.1038/ncomms12285.
- 778 57. Andrew D. Letten and Daniel B. Stouffer. The mechanistic basis for higher-order interactions  
779 and non-additivity in competitive communities. *Ecology Letters*, 22(3):423–436, mar 2019.  
780 doi: 10.1111/ele.13211.
- 781 58. Ian Billick and Ted J. Case. Higher Order Interactions in Ecological Communities: What  
782 Are They and How Can They be Detected? *Ecology*, 75(6):1529–1543, sep 1994. doi:  
783 10.2307/1939614.
- 784 59. Ali R. Zomorodi and Daniel Segrè. Synthetic Ecology of Microbes: Mathematical Models  
785 and Applications. *Journal of Molecular Biology*, 428(5):837–861, 2016. doi: 10.1016/j.jmb.  
786 2015.10.019.
- 787 60. Hong-Tai Cao, Travis E. Gibson, Amir Bashan, and Yang-Yu Liu. Inferring human micro-  
788 bial dynamics from temporal metagenomics data: Pitfalls and lessons. *BioEssays*, 39(2):  
789 1600188, feb 2017. doi: 10.1002/bies.201600188.
- 790 61. William R Harcombe et al. Metabolic resource allocation in individual microbes determines  
791 ecosystem interactions and spatial dynamics. *Cell reports*, 7(4):1104–15, may 2014. ISSN  
792 2211-1247. doi: 10.1016/j.celrep.2014.03.070.
- 793 62. Babak Momeni, Li Xie, and Wenyang Shou. Lotka-Volterra pairwise modeling fails to capture  
794 diverse pairwise microbial interactions. *eLife*, 6:e25051, mar 2017. doi: 10.7554/eLife.  
795 25051.
- 796 63. Stephen R Lindemann et al. Engineering microbial consortia for controllable outputs. *The*  
797 *ISME Journal*, 10(9):2077–2084, sep 2016. doi: 10.1038/ismej.2016.26.
- 798 64. Pawel Sierocinski et al. A Single Community Dominates Structure and Function of a Mixture  
799 of Multiple Methanogenic Communities. *Current biology : CB*, 27(21):3390–3395.e4, nov  
800 2017. doi: 10.1016/j.cub.2017.09.056.
- 801 65. Thomas Bell, Jonathan A Newman, Bernard W Silverman, Sarah L Turner, and Andrew K  
802 Lilley. The contribution of species richness and composition to bacterial services. *Nature*,  
803 436(7054):1157–60, aug 2005. ISSN 1476-4687. doi: 10.1038/nature03891.
- 804 66. Xiaoqian Yu, Martin F. Polz, and Eric J. Alm. Interactions in self-assembled micro-  
805 bial communities saturate with diversity. *The ISME Journal*, page 1, feb 2019. doi:  
806 10.1038/s41396-019-0356-5.
- 807 67. Eugene Anatoly Yurtsev, Arolyn Conwill, and Jeff Gore. Oscillatory dynamics in a bacterial  
808 cross-protection mutualism. *Proceedings of the National Academy of Sciences*, 113(22):  
809 6236–6241, may 2016. doi: 10.1073/pnas.1523317113.
- 810 68. Robin A. Sorg et al. Collective Resistance in Microbial Communities by Intracellular Antibio-  
811 tic Deactivation. *PLOS Biology*, 14(12):e2000631, dec 2016. doi: 10.1371/journal.pbio.  
812 2000631.
- 813 69. Isabel Frost et al. Cooperation, competition and antibiotic resistance in bacterial colonies.  
814 *The ISME Journal*, 12(6):1582–1593, jun 2018. ISSN 1751-7362. doi: 10.1038/  
s41396-018-0090-4.
70. Marjon G J de Vos, Marcin Zagorski, Alan McNally, and Tobias Bollenbach. Interaction  
networks, ecological stability, and collective antibiotic tolerance in polymicrobial infections.  
*Proceedings of the National Academy of Sciences of the United States of America*, 114(40):  
10666–10671, oct 2017. doi: 10.1073/pnas.1713372114.
71. Philipp Engel et al. The Bee Microbiome: Impact on Bee Health and Model for Evolution  
and Ecology of Host-Microbe Interactions. *mBio*, 7(2):e02164–15, apr 2016. doi: 10.1128/  
mBio.02164-15.
72. Robin Tecon, Sara Mitri, Davide Ciccacese, Dani Or, Jan Roelof van der Meer, and David R.  
Johnston. Bridging the Holistic-Reductionist Divide in Microbial Ecology. *mSystems*, 4(1):  
e00265–18, feb 2019. doi: 10.1128/mSystems.00265-18.
73. Benjamin E. Wolfe, Julie E. Button, Marcela Santarelli, and Rachel J. Dutton. Cheese  
Rind Communities Provide Tractable Systems for In Situ and In Vitro Studies of Microbial  
Diversity. *Cell*, 158(2):422–433, jul 2014. ISSN 00928674. doi: 10.1016/j.cell.2014.05.041.
74. Christopher J van der Gast and Ian P Thompson. Effects of pH amendment on metal work-  
ing fluid wastewater biological treatment using a defined bacterial consortium. *Biotechnol-  
ogy and Bioengineering*, 89(3):357–66, feb 2005. ISSN 0006-3592. doi: 10.1002/bit.20351.
